# Supplementary material for: Synthesis, structures and magnetic properties of chiral 3d–3d′–4f heterotrimetallic complexes based on [(Tp*)Fe(CN)3]−
Source: Royal Society of Chemistry journal article supplement (doi:10.1039/c7nj01413a), 2017-01-01
Supplement: c7nj01413a1.pdf [file c7nj01413a1.pdf]

For submission to *New J. Chem.* Revised Manuscript (NJ-ART-04-2017-001413)

## Synthesis, Structures and Magnetic Properties of Chiral 3d-3d'- 4f Heterobimetallic Complexes Based on [(Tp\*)Fe(CN)<sub>3</sub>]<sup>-</sup>

Xiao-Wei Deng,<sup>a</sup> Li-Zheng Cai,<sup>a</sup> Zhao-Xia Zhu,<sup>a</sup> Feng Gao<sup>\*b</sup> Yan-Ling Zhou<sup>\*c</sup> and  
Min-Xia Yao<sup>\*a</sup>

<sup>a</sup> College of Chemistry & Molecular Engineering, Nanjing Tech University, Nanjing,  
211816, P. R. China.

<sup>b</sup> School of Chemistry and Materials Science, Jiangsu Normal University, Xuzhou,  
221116, P. R. China.

<sup>c</sup> School of Chemistry and Chemical Engineering, Guangxi University, Nanning,  
530004, P. R. China.

### Support Information

**Table S1** Summary of crystallographic data for all complexes.

|                                                | 1-RR                                                                                                   | 1-SS                                                                                                   | 2-RR                                                                                                   | 2-SS                                                                                                   | 3-RR                                                                                                   | 3-SS                                                                                                   |
|------------------------------------------------|--------------------------------------------------------------------------------------------------------|--------------------------------------------------------------------------------------------------------|--------------------------------------------------------------------------------------------------------|--------------------------------------------------------------------------------------------------------|--------------------------------------------------------------------------------------------------------|--------------------------------------------------------------------------------------------------------|
| formula                                        | C <sub>60</sub> H <sub>92</sub> B <sub>2</sub> CuG<br>dFe <sub>2</sub> N <sub>21</sub> O <sub>17</sub> | C <sub>60</sub> H <sub>92</sub> B <sub>2</sub> CuG<br>dFe <sub>2</sub> N <sub>21</sub> O <sub>17</sub> | C <sub>60</sub> H <sub>92</sub> B <sub>2</sub> CuT<br>bFe <sub>2</sub> N <sub>21</sub> O <sub>17</sub> | C <sub>60</sub> H <sub>92</sub> B <sub>2</sub> CuT<br>bFe <sub>2</sub> N <sub>21</sub> O <sub>17</sub> | C <sub>60</sub> H <sub>92</sub> B <sub>2</sub> CuD<br>yFe <sub>2</sub> N <sub>21</sub> O <sub>17</sub> | C <sub>60</sub> H <sub>92</sub> B <sub>2</sub> CuDy<br>Fe <sub>2</sub> N <sub>21</sub> O <sub>17</sub> |
| fw                                             | 1733.61                                                                                                | 1733.61                                                                                                | 1735.29                                                                                                | 1735.29                                                                                                | 1738.86                                                                                                | 1738.86                                                                                                |
| crystal system                                 | Monoclinic                                                                                             | Monoclinic                                                                                             | Monoclinic                                                                                             | Monoclinic                                                                                             | Monoclinic                                                                                             | Monoclinic                                                                                             |
| space group                                    | <i>P</i> 2 <sub>1</sub>                                                                                |
| <i>a</i> , Å                                   | 13.4352(9)                                                                                             | 13.5975(11)                                                                                            | 13.559(7)                                                                                              | 13.5669(13)                                                                                            | 13.585(3)                                                                                              | 13.4347(11)                                                                                            |
| <i>b</i> , Å                                   | 16.0651(11)                                                                                            | 16.1208(13)                                                                                            | 16.024(9)                                                                                              | 16.1004(16)                                                                                            | 16.218(3)                                                                                              | 16.0670(13)                                                                                            |
| <i>c</i> , Å                                   | 17.6194(12)                                                                                            | 17.9767(15)                                                                                            | 17.767(10)                                                                                             | 17.8246(18)                                                                                            | 18.401(4)                                                                                              | 17.6509(14)                                                                                            |
| <i>a</i> , deg                                 | 90                                                                                                     | 90                                                                                                     | 90                                                                                                     | 90                                                                                                     | 90                                                                                                     | 90                                                                                                     |
| <i>β</i> , deg                                 | 103.5480(10)                                                                                           | 103.4320(10)                                                                                           | 103.229(9)                                                                                             | 103.2710(10)                                                                                           | 103.848(4)                                                                                             | 103.5890(10)                                                                                           |
| <i>γ</i> , deg                                 | 90                                                                                                     | 90                                                                                                     | 90                                                                                                     | 90                                                                                                     | 90                                                                                                     | 90                                                                                                     |
| <i>V</i> , Å <sup>3</sup>                      | 3697.1(4)                                                                                              | 3832.8(5)                                                                                              | 3758(4)                                                                                                | 3789.5(6)                                                                                              | 3936.3(14)                                                                                             | 3703.4(5)                                                                                              |
| <i>Z</i>                                       | 2                                                                                                      | 2                                                                                                      | 2                                                                                                      | 2                                                                                                      | 2                                                                                                      | 2                                                                                                      |
| <i>ρ</i> <sub>calcd</sub> , g cm <sup>-3</sup> | 1.419                                                                                                  | 1.369                                                                                                  | 1.397                                                                                                  | 1.384                                                                                                  | 1.337                                                                                                  | 1.421                                                                                                  |
| <i>T</i> / K                                   | 296(2)                                                                                                 | 296(2)                                                                                                 | 296(2)                                                                                                 | 296(2)                                                                                                 | 296(2)                                                                                                 | 296(2)                                                                                                 |
| <i>μ</i> , mm <sup>-1</sup>                    | 1.619                                                                                                  | 1.561                                                                                                  | 1.651                                                                                                  | 1.637                                                                                                  | 1.627                                                                                                  | 1.729                                                                                                  |
| <i>θ</i> , deg                                 | 1.725 to 26.00                                                                                         | 1.718 to 26.00                                                                                         | 1.177 to 26.00                                                                                         | 1.726 to 26.00                                                                                         | 1.544 to 26.00                                                                                         | 1.724 to 27.54                                                                                         |

\* To whom correspondence should be addressed. Email: yaomx@njtech.edu.cn. Fax: +86-25-58139528. Nanjing Tech University.

|                                         |                                       |                                        |                                              |                                        |                                              |                                              |
|-----------------------------------------|---------------------------------------|----------------------------------------|----------------------------------------------|----------------------------------------|----------------------------------------------|----------------------------------------------|
| $F(000)$                                | 1608                                  | 1608                                   | 1608                                         | 1606                                   | 1612                                         | 1612                                         |
| index ranges                            | -16<=h<=16<br>19<=k<=19<br>-21<=l<=10 | -16<=h<=14<br>-19<=k<=16<br>-18<=l<=22 | -16 ≤ h ≤ 10<br>-19 ≤ k ≤ 19<br>-19 ≤ l ≤ 21 | -16<=h<=11<br>-19<=k<=16<br>-21<=l<=21 | -16 ≤ h ≤ 14<br>-18 ≤ k ≤ 20<br>-17 ≤ l ≤ 22 | -16 ≤ h ≤ 17<br>-18 ≤ k ≤ 20<br>-21 ≤ l ≤ 22 |
| data/restraints<br>/parameters          | 13678/ 2 / 871                        | 12347/ 3 / 871                         | 14555/ 1/ 871                                | 12803 / 4 / 871                        | 14503 / 1/871                                | 13795 / 1/ 870                               |
| GOF ( $F^2$ )                           | 0.982                                 | 0.951                                  | 0.934                                        | 0.939                                  | 0.909                                        | 0.941                                        |
| $R_I^a, wR_2^b$<br>( $I > 2\sigma(I)$ ) | 0.0421<br>0.0773                      | 0.0457<br>0.1038                       | 0.0418<br>0.0752                             | 0.0484<br>0.1099                       | 0.0450<br>0.0807                             | 0.941<br>0.0630                              |
| $R_I^a, wR_2^b$<br>(all data)           | 0.0537<br>0.0813                      | 0.0618<br>0.1097                       | 0.0642<br>0.0813                             | 0.0702<br>0.1179                       | 0.0676<br>0.0880                             | 0.0379<br>0.0647                             |
| Flack $\chi$                            | 0.045(11)                             | -0.009(16)                             | -0.012(11)                                   | 0.013(15)                              | 0.035(11)                                    | 0.006(6)                                     |

$$R_I^a = \frac{\sum ||F_o| - |F_c||}{\sum F_o}, \quad wR_2^b = \left[ \frac{\sum w(F_o^2 - F_c^2)^2}{\sum w(F_o^2)^2} \right]^{1/2}$$

**Table S2** Selected bond lengths (Å) and angles (°) for **1-RR**.

|            |            |             |            |
|------------|------------|-------------|------------|
| Cu1-O2     | 1.909(6)   | Cu1-O3      | 1.931(5)   |
| Cu1-N10    | 1.917(6)   | Cu1-N11     | 1.922(7)   |
| Cu1-N9     | 2.582(7)   | Gd1-O1      | 2.597(5)   |
| Gd1-O2     | 2.362 (5)  | Gd1-O3      | 2.357 (6)  |
| Gd1-O4     | 2.578(5)   | Gd1-O5      | 2.513 (5)  |
| Gd1-O6     | 2.515(5)   | Gd1-O1W     | 2.383(5)   |
| Gd1-O2W    | 2.372 (5)  | Gd1-O3W     | 2.369(6)   |
| Cu1-Gd1    | 3.413 (1)  | Fe1-N1      | 2.019 (6)  |
| Fe1-N3     | 1.989(7)   | Fe1-N5      | 1.981 (8)  |
| Fe1-C16    | 1.921(9)   | Fe1-C17     | 1.921 (9)  |
| Fe1-C18    | 1.924 (7)  | Fe2-N12     | 1.989 (6)  |
| Fe2-N14    | 1.999(7)   | Fe2-N16     | 1.986 (7)  |
| Fe2-C56    | 1.943 (9)  | Fe2-C57     | 1.936 (8)  |
| Fe2-C58    | 1.909(8)   | O1-Gd1-O2   | 61.48 (2)  |
| O1-Gd1-O3  | 126.96(2)  | O1-Gd1-O4   | 155.24(1)  |
| O1-Gd1-O5  | 67.94 (2)  | O1-Gd1-O6   | 116.93(1)  |
| O1-Gd1-O1W | 100.81 (2) | O1-Gd1-O2W  | 84.79 (2)  |
| O1-Gd1-O3W | 78.12(1)   | O2-Gd1-O3   | 65.64 (2)  |
| O2-Gd1-O4  | 123.47(2)  | O2-Gd1-O5   | 113.93(2)  |
| O2-Gd1-O6  | 153.16(2)  | O2-Gd1-O1W  | 79.41(2)   |
| O2-Gd1-O2W | 73.34 (2)  | O2-Gd1-O3W  | 128.14 (2) |
| O3-Gd1-O4  | 62.21(2)   | O3-Gd1-O5   | 143.12 (2) |
| O3-Gd1-O6  | 111.78(2)  | O3-Gd1-O1W  | 72.73 (2)  |
| O3-Gd1-O2W | 76.62 (2)  | O3-Gd1-O3W  | 137.33 (2) |
| O5-Gd1-O6  | 50.75 (2)  | O5-Gd1-O1W  | 71.15 (2)  |
| O5-Gd1-O2W | 140.09 (2) | O5-Gd1-O3W  | 74.32 (2)  |
| O6-Gd1-O1W | 74.62(2)   | O6-Gd1-O2W  | 133.25(2)  |
| O6-Gd1-O3W | 73.17 (2)  | O2W-Gd1-O3W | 71.85(2)   |

|             |            |             |            |
|-------------|------------|-------------|------------|
| O2-Cu1-O3   | 83.56 (2)  | O2-Cu1-N10  | 95.78 (2)  |
| O2-Cu1-N11  | 170.44(3)  | O2-Cu1-N9   | 96.64(2)   |
| O3-Cu1-N9   | 88.92 (2)  | O3-Cu1-N10  | 178.54 (2) |
| O3-Cu1-N11  | 94.04(2)   | N9-Cu-N10   | 92.45(2)   |
| N9-Cu-N11   | 92.56 (2)  | N10-Cu-N11  | 86.40(3)   |
| N1-Fe1-N3   | 89.28 (3)  | N1-Fe1-N5   | 90.38(3)   |
| N3-Fe1-N5   | 88.55 (3)  | C16-Fe1-C17 | 90.36 (4)  |
| C16-Fe1-C18 | 85.70(4)   | C17-Fe1-C18 | 85.62(3)   |
| N7-C16-Fe1  | 177.63 (9) | N9-C18-Fe1  | 175.09 (7) |
| N8-C17-Fe1  | 177.78(8)  | N12-Fe2-N14 | 89.21(3)   |
| N12-Fe2-N16 | 88.85(3)   | N14-Fe2-N16 | 89.10(3)   |
| C56-Fe2-C57 | 84.82(4)   | C56-Fe2-C58 | 85.54(3)   |
| C57-Fe1-C58 | 85.60(3)   | N18-C56-Fe2 | 175.34(7)  |
| N19-C57-Fe2 | 176.22(8)  | N20-C58-Fe2 | 178.05 (7) |

**Table S3** Selected bond lengths (Å) and angles (°) for **1-SS**.

|            |            |            |            |
|------------|------------|------------|------------|
| Cu1-O2     | 1.925(5)   | Cu1-O3     | 1.916(6)   |
| Cu1-N9     | 2.638(9)   | Cu1-N19    | 1.926(9)   |
| Cu1-N20    | 1.922(6)   | Gd1-O1     | 2.591(6)   |
| Gd1-O2     | 2.366(6)   | Gd1-O3     | 2.374(5)   |
| Gd1-O4     | 2.605(7)   | Gd1-O5     | 2.512(6)   |
| Gd1-O6     | 2.518(6)   | Gd1-O1W    | 2.440(7)   |
| Gd1-O2W    | 2.397(5)   | Gd1-O3W    | 2.415(8)   |
| Cu1-Gd1    | 3.419(1)   | Fe1-N2     | 2.009(7)   |
| Fe1-N4     | 2.004(8)   | Fe1-N6     | 1.999(9)   |
| Fe1-C16    | 1.963(1)   | Fe1-C17    | 1.932(1)   |
| Fe1-C18    | 1.947(9)   | Fe2-N10    | 1.980(9)   |
| Fe2-N12    | 2.005(8)   | Fe2-N14    | 2.011(7)   |
| Fe2-C34    | 1.922(1)   | Fe2-C35    | 1.892(1)   |
| Fe2-C36    | 1.952(1)   | O1-Gd1-O2  | 62.19(2)   |
| O1-Gd1-O3  | 123.79 (2) | O1-Gd1-O4  | 156.28(2)  |
| O1-Gd1-O5  | 119.74(2)  | O1-Gd1-O6  | 69.92(2)   |
| O1-Gd1-O1W | 103.6(22)  | O1-Gd1-O2W | 75.69 (2)  |
| O1-Gd1-O3W | 82.77(2)   | O2-Gd1-O3  | 65.57(2)   |
| O2-Gd1-O4  | 126.38(2)  | O2-Gd1-O5  | 144.17 (2) |
| O2-Gd1-O6  | 112.22(2)  | O2-Gd1-O1W | 72.75 (2)  |
| O2-Gd1-O2W | 76.78 (2)  | O2-Gd1-O3W | 136.65 (2) |
| O3-Gd1-O4  | 60.97(2)   | O3-Gd1-O5  | 114.38 (2) |
| O3-Gd1-O6  | 153.25(2)  | O3-Gd1-O1W | 78.77 (2)  |
| O3-Gd1-O2W | 73.69 (2)  | O3-Gd1-O3W | 126.78 (2) |
| O4-Gd1-O5  | 68.02(2)   | O4-Gd1-O6  | 117.04(2)  |
| O4-Gd1-O1W | 100.09(2)  | O4-Gd1-O2W | 84.76(2)   |
| O4-Gd1-O3W | 77.96(2)   | O5-Gd1-O6  | 50.50(2)   |

|             |            |             |            |
|-------------|------------|-------------|------------|
| O5-Gd1-O1W  | 72.30(2)   | O5-Gd1-O2W  | 138.94(2)  |
| O5-Gd1-O3W  | 74.46(2)   | O6-Gd1-O1W  | 75.39(2)   |
| O6-Gd1-O2W  | 132.86(2)  | O6-Gd1-O3W  | 74.45(2)   |
| O1W-Gd1-O2W | 145.27 (2) | O1W-Gd1-O3W | 144.67 (2) |
| O2W-Gd1-O3W | 70.06 (2)  | O2-Cu-O3    | 83.85 (2)  |
| O2-Cu-N9    | 89.28(3)   | O2-Cu-N19   | 93.25 (3)  |
| O2-Cu-N20   | 177.86 (2) | O3-Cu-N9    | 96.95(2)   |
| O3-Cu- N19  | 169.68 (3) | O3-Cu- N20  | 95.59 (3)  |
| N9-Cu-N19   | 92.90(3)   | N9-Cu-N20   | 92.84(3)   |
| N19-Cu-N20  | 86.93 (3)  | N2-Fe1-N4   | 88.73(3)   |
| N2-Fe1-N6   | 90.05(3)   | N4-Fe1-N6   | 88.02 (3)  |
| C16-Fe1-C17 | 92.37(5)   | C16-Fe1-C18 | 85.83(4)   |
| C17-Fe1-C18 | 85.24(4)   | N7-C16-Fe1  | 179.50(1)  |
| N8-C17-Fe1  | 179.64(9)  | N9-C18-Fe1  | 176.83 (9) |
| C34-Fe2-C36 | 87.01(48)  | N16-C34-Fe2 | 177.49(1)  |
| N17-C35-Fe2 | 174.97(1)  | N18-C36-Fe2 | 175.78(1)  |

**Table S4** Selected bond lengths (Å) and angles (°) for **2-RR**.

|             |           |             |            |
|-------------|-----------|-------------|------------|
| Cu1-O2      | 1.887 (6) | Cu1-O3      | 1.909 (5)  |
| Cu1-N19     | 1.921(6)  | Cu1-N20     | 1.913(8)   |
| Cu1-N17     | 2.632(7)  | Tb1-O1      | 2.585(5)   |
| Tb 1-O2     | 2.355(5)  | Tb 1-O3     | 2.349 (5)  |
| Tb 1-O4     | 2.571(5)  | Tb 1-O6     | 2.487(5)   |
| Tb 1-O7     | 2.486(6)  | Tb 1-O1W    | 2.360(6)   |
| Tb 1-O2W    | 2.373(5)  | Tb 1-O3W    | 2.333(6)   |
| Cu1-Tb1     | 3.394(2)  | Fe2-N10     | 1.983(7)   |
| Fe2-N12     | 1.987(8)  | Fe2-N14     | 1.993(6)   |
| Fe2-C34     | 1.894(9)  | Fe2-C35     | 1.917 (7)  |
| Fe2-C36     | 1.930(9)  | Fe1-N1      | 1.996(8)   |
| Fe1-N3      | 1.983(8)  | Fe1-N5      | 1.996(6)   |
| Fe1-C16     | 1.916(1)  | Fe1-C17     | 1.919 (9)  |
| Fe1-C18     | 1.907(9)  | O1-Tb1-O2   | 62.02(2)   |
| O1-Tb1-O3   | 127.04(2) | O1-Tb1-O4   | 155.67 (1) |
| O1-Tb1-O6   | 116.52(2) | O1-Tb1-O7   | 67.42 (2)  |
| O1-Tb1-O1W  | 100.35(2) | O1- Tb1-O2W | 84.58(2)   |
| O1- Tb1-O3W | 77.45(2)  | O2-Tb1-O3   | 65.17(2)   |
| O2-Tb1-O4   | 123.59(2) | O2-Tb1-O6   | 152.68 (2) |
| O2-Tb1-O7   | 113.87(2) | O2-Tb1-O1W  | 78.19 (2)  |
| O2-Tb1-O2W  | 73.37(2)  | O2-Tb1-O3W  | 127.61 (2) |
| O3-Tb1-O4   | 62.49(2)  | O3-Tb1-O6   | 111.96 (2) |
| O3-Tb1-O7   | 143.31(2) | O3-Tb1-O1W  | 72.27(2)   |
| O3-Tb1-O2W  | 76.90(2)  | O3-Tb1-O3W  | 137.25(2)  |
| O4-Tb1-O6   | 70.14 (1) | O4-Tb1-O7   | 120.27 (2) |

|             |            |             |           |
|-------------|------------|-------------|-----------|
| O4-Tb1-O1W  | 103.97 (2) | O4-Tb1-O2W  | 75.84(2)  |
| O4-Tb1-O3W  | 82.55(2)   | O6-Tb1-O7   | 50.79(2)  |
| O6-Tb1-O1W  | 75.32(2)   | O6-Tb1-O2W  | 133.69(2) |
| O6-Tb1-O3W  | 74.26(2)   | O7-Tb1-O1W  | 71.83 (2) |
| O7-Tb1-O2W  | 139.56(2)  | O7-Tb1-O3W  | 74.75(2)  |
| O1W-Tb1-O2W | 144.63(2)  | O1W-Tb1-O3W | 144.40(2) |
| O2W-Tb1-O3W | 70.96(2)   | O2-Cu-O3    | 83.71(2)  |
| O2-Cu-N17   | 97.37(2)   | O2-Cu-N19   | 96.03(3)  |
| O2-Cu-N20   | 169.62(3)  | O3-Cu-N17   | 89.44(2)  |
| O3-Cu-N19   | 178.04(2)  | O3-Cu-N20   | 93.81 (3) |
| N17-Cu-N19  | 92.52(3)   | N17-Cu-N20  | 92.69(3)  |
| N19-Cu-N20  | 86.04(3)   | N10-Fe2-N12 | 88.09 (3) |
| N10-Fe2-N14 | 88.92(3)   | N12-Fe2-N14 | 91.24(3)  |
| C34-Fe2-C35 | 85.55(4)   | C34-Fe2-C36 | 90.62 (4) |
| C35-Fe2-C36 | 85.41(4)   | N16-C34-Fe2 | 179.15(8) |
| N17-C35-Fe2 | 176.81(8)  | N18-C36-Fe2 | 178.76(9) |
| C17-Fe1-C18 | 86.11(4)   | N7-C16-Fe1  | 176.03(9) |
| N8-C17-Fe1  | 176.83(9)  | N9-C18-Fe1  | 178.99(8) |

**Table S5** Selected bond lengths (Å) and angles (°) for **2-SS**.

|            |           |            |           |
|------------|-----------|------------|-----------|
| Cu1-O1     | 1.903(73) | Cu1-O2     | 1.934(6)  |
| Cu1-N17    | 2.635(9)  | Cu1-N19    | 1.924(9)  |
| Cu1-N20    | 1.958(1)  | Tb1-O1     | 2.359(6)  |
| Tb1-O2     | 2.359(7)  | Tb1-O3     | 2.578(9)  |
| Tb1-O4     | 2.582(2)  | Tb1-O6     | 2.501(8)  |
| Tb1-O7     | 2.493(7)  | Tb1-O1W    | 2.377(7)  |
| Tb1-O2W    | 2.379 (6) | Tb1-O3W    | 2.357(8)  |
| Cu1-Tb1    | 3.396(1)  | Fe3-N1     | 1.989(1)  |
| Fe3-N3     | 2.006(1)  | Fe3-N5     | 2.009(9)  |
| Fe3-C16    | 1.910(1)  | Fe3-C17    | 1.925(1)  |
| Fe3-C18    | 1.937(1)  | Fe4-N10    | 1.979(9)  |
| Fe4-N12    | 2.001(9)  | Fe4-N14    | 1.988(9)  |
| Fe4-C34    | 1.964(1)  | Fe4-C35    | 1.917(9)  |
| Fe4-C36    | 1.895(1)  | O1-Tb1-O2  | 66.23(2)  |
| O1-Tb1-O3  | 124.18(2) | O1-Tb1-O4  | 61.51(2)  |
| O1-Tb1-O6  | 114.17(3) | O1-Tb1-O7  | 152.93(2) |
| O1-Tb1-O1W | 78.40(2)  | O1-Tb1-O2W | 73.44(2)  |
| O1-Tb1-O3W | 127.48(2) | O2-Tb1-O3  | 61.94(2)  |
| O2-Tb1-O4  | 127.56(2) | O2-Tb1-O6  | 143.78(2) |
| O2-Tb1-O7  | 111.56(2) | O2-Tb1-O1W | 72.92(2)  |
| O2-Tb1-O2W | 76.34(2)  | O2-Tb1-O3W | 137.19(2) |
| O3-Tb1-O4  | 155.89(2) | O3-Tb1-O6  | 119.50(3) |
| O3-Tb1-O7  | 69.75(2)  | O3-Tb1-O1W | 104.09(2) |

|             |           |             |            |
|-------------|-----------|-------------|------------|
| O3-Tb1-O2W  | 75.67(2)  | O3-Tb1-O3W  | 82.81(2)   |
| O4-Tb1-O6   | 67.77(3)  | O4-Tb1-O7   | 116.62(2)  |
| O4-Tb1-O1W  | 100.02(2) | O4-Tb1-O2W  | 85.07(2)   |
| O4-Tb1-O3W  | 77.39(2)  | O6-Tb1-O7   | 50.44(3)   |
| O6-Tb1-O1W  | 71.92(3)  | O6-Tb1-O2W  | 139.79(3)  |
| O6-Tb1-O3W  | 73.71(2)  | O7-Tb1-O1W  | 75.41(2)   |
| O7-Tb1-O2W  | 133.39(2) | O7-Tb1-O3W  | 73.76(2)   |
| O1W-Tb1-O2W | 144.62(2) | O1W-Tb1-O3W | 143.63(2)  |
| O2W-Tb1-O3W | 71.73(2)  | O1-Cu1-O2   | 84.40(3)   |
| O1-Cu1-N17  | 97.22(3)  | O1-Cu1-N19  | 95.76(3)   |
| O1-Cu1-N20  | 170.79(4) | O2-Cu1-N17  | 88.67(3)   |
| O2-Cu1-N19  | 178.36(3) | O2-Cu1-N20  | 93.45(4)   |
| N17-Cu1-N19 | 92.92(4)  | N17-Cu1-N20 | 91.68(4)   |
| N19-Cu1-N20 | 86.13(3)  | N10-Fe4-N12 | 89.29(4)   |
| N10-Fe4-N14 | 90.92(4)  | N12-Fe4-N14 | 89.11(4)   |
| C34-Fe4-C35 | 85.58(5)  | C34-Fe4-C36 | 90.33(6)   |
| C35-Fe4-C36 | 84.92(5)  | N16-C34-Fe4 | 179.08 (1) |
| N17-C35-Fe4 | 177.17(9) | N18-C36-Fe4 | 176.37(1)  |
| C16-Fe3-C17 | 86.39(5)  | N7-C16-Fe3  | 177.56(1)  |
| N8-C17-Fe3  | 174.26(1) | N9-C18-Fe3  | 174.77(1)  |

**Table S6** Selected bond lengths (Å) and angles (°) for **3-RR**.

|            |           |            |           |
|------------|-----------|------------|-----------|
| Cu1-O2     | 1.906(6)  | Cu1-O3     | 1.915(5)  |
| Cu1-N7     | 2.595(7)  | Cu1-N10    | 1.944(8)  |
| Cu1-N11    | 1.922(8)  | Dy1-O1     | 2.583(6)  |
| Dy1-O2     | 2.349(6)  | Dy1-O3     | 2.339(6)  |
| Dy1-O4     | 2.558(6)  | Dy1-O6     | 2.444(6)  |
| Dy1-O7     | 2.486(6)  | Dy1-O1W    | 2.342(7)  |
| Dy1-O2W    | 2.356(5)  | Dy1-O3W    | 2.331(6)  |
| Cu1-Dy1    | 3.401(2)  | Fe1-N1     | 1.993 (8) |
| Fe1-N3     | 1.990(6)  | Fe1-N5     | 2.006(8)  |
| Fe1-C16    | 1.917(8)  | Fe1-C17    | 1.915(1)  |
| Fe1-C18    | 1.886(9)  | Fe2-N13    | 1.999(7)  |
| Fe2-N15    | 1.989(8)  | Fe2-N17    | 1.998(9)  |
| Fe2-C56    | 1.922(1)  | Fe2-C57    | 1.923(9)  |
| Fe2-C58    | 1.923(1)  | O1-Dy1-O2  | 61.67(2)  |
| O1-Dy1-O3  | 126.73(2) | O1-Dy1-O4  | 157.17(2) |
| O1-Dy1-O6  | 66.97(2)  | O1-Dy1-O7  | 116.79(2) |
| O1-Dy1-O1W | 100.62(2) | O1-Dy1-O2W | 84.61(2)  |
| O1-Dy1-O3W | 77.45(2)  | O2-Dy1-O3  | 65.43(2)  |
| O2-Dy1-O4  | 124.71(2) | O2-Dy1-O6  | 112.51(2) |
| O2-Dy1-O7  | 152.54(2) | O2-Dy1-O1W | 77.43(2)  |
| O2-Dy1-O2W | 74.85(2)  | O2-Dy1-O3W | 128.09(2) |

|             |           |             |           |
|-------------|-----------|-------------|-----------|
| O3-Dy1-O4   | 62.02(2)  | O3-Dy1-O6   | 144.64(2) |
| O3-Dy1-O7   | 112.73(2) | O3-Dy1-O1W  | 73.15(2)  |
| O3-Dy1-O2W  | 76.11(2)  | O3-Dy1-O3W  | 136.41(2) |
| O4-Dy1-O6   | 119.88(2) | O4-Dy1-O7   | 68.55(2)  |
| O4-Dy1-O1W  | 102.19(2) | O4-Dy1-O2W  | 77.19(2)  |
| O4-Dy1-O3W  | 83.49(2)  | O6-Dy1-O7   | 51.73(2)  |
| O6-Dy1-O1W  | 72.12(2)  | O6-Dy1-O2W  | 139.00(2) |
| O6-Dy1-O3W  | 74.70(2)  | O7-Dy1-O1W  | 76.06(2)  |
| O7-Dy1-O2W  | 132.41(2) | O7-Dy1-O3W  | 73.57(2)  |
| O1W-Dy1-O2W | 144.99(2) | O1W-Dy1-O3W | 144.45(2) |
| O2W-Dy1-O3W | 70.55(2)  | O2-Cu-O3    | 83.10(2)  |
| O2-Cu-N7    | 96.84(2)  | O2-Cu-N10   | 95.95(3)  |
| O2-Cu-N11   | 169.49(3) | O3-Cu-N7    | 89.21(2)  |
| O3-Cu-N10   | 177.76(3) | O3-Cu-N11   | 94.61(3)  |
| N7-Cu-N10   | 92.92(3)  | N7-Cu-N11   | 93.37(3)  |
| N10-Cu-N11  | 85.95(3)  | N1-Fe1-N3   | 90.14(3)  |
| N1-Fe1-N5   | 89.18(3)  | N3-Fe1-N5   | 89.45(3)  |
| C16-Fe1-C17 | 85.21(4)  | C16-Fe1-C18 | 85.29(4)  |
| C17-Fe1-C18 | 89.94(5)  | N7-C16-Fe1  | 176.74(8) |
| N8-C17-Fe1  | 178.48(1) | N9-C18-Fe1  | 178.90(8) |
| C56-Fe2-C57 | 85.33(4)  | N19-C56-Fe2 | 177.83(1) |
| N20-C57-Fe2 | 179.35(9) | N21-C58-Fe2 | 174.70(1) |

**Table S7** Selected bond lengths (Å) and angles (°) for **3-SS**.

|            |           |            |           |
|------------|-----------|------------|-----------|
| Cu1-O2     | 1.924(3)  | Cu1-O3     | 1.905(4)  |
| Cu1-N7     | 2.605(4)  | Cu1-N10    | 1.926(5)  |
| Cu1-N11    | 1.921(5)  | Dy1-O1     | 2.567(3)  |
| Dy1-O2     | 2.345(3)  | Dy1-O3     | 2.342(3)  |
| Dy1-O4     | 2.581(3)  | Dy1-O5     | 2.481(4)  |
| Dy1-O6     | 2.494(3)  | Dy1-O1W    | 2.331(3)  |
| Dy1-O2W    | 2.339(4)  | Dy1-O3W    | 2.350(3)  |
| Cu1-Dy1    | 3.396(8)  | Fe1-N1     | 1.983(5)  |
| Fe1-N3     | 2.015(4)  | Fe1-N5     | 2.003(5)  |
| Fe1-C16    | 1.927(5)  | Fe1-C17    | 1.932(6)  |
| Fe1-C18    | 1.934(6)  | Fe2-N13    | 1.995(5)  |
| Fe2-N15    | 1.997(4)  | Fe2-N17    | 1.991(5)  |
| Fe2-C56    | 1.922(5)  | Fe2-C57    | 1.934(6)  |
| Fe2-C58    | 1.917(6)  | O1-Dy1-O2  | 62.62(1)  |
| O1-Dy1-O3  | 123.94(1) | O1-Dy1-O4  | 155.15(1) |
| O1-Dy1-O5  | 120.12(1) | O1-Dy1-O6  | 69.57(1)  |
| O1-Dy1-O1W | 103.90(1) | O1-Dy1-O2W | 81.84(1)  |
| O1-Dy1-O3W | 75.31(1)  | O2-Dy1-O3  | 65.83(1)  |
| O2-Dy1-O4  | 127.58(1) | O2-Dy1-O5  | 142.88(1) |

|             |            |             |            |
|-------------|------------|-------------|------------|
| O2-Dy1-O6   | 111.32(1)  | O2-Dy1-O1W  | 72.26(1)   |
| O2-Dy1-O2W  | 137.63(1)  | O2-Dy1-O3W  | 77.25(1)   |
| O3-Dy1-O4   | 61.87(1)   | O3-Dy1-O5   | 113.93(1)  |
| O3-Dy1-O6   | 153.59(1)  | O3-Dy1-O1W  | 79.45(1)   |
| O3-Dy1-O2W  | 128.06(1)  | O3-Dy1-O3W  | 73.33(1)   |
| O4-Dy1-O5   | 67.44(1)   | O4-Dy1-O6   | 116.79(1)  |
| O4-Dy1-O1W  | 100.93(1)  | O4-Dy1-O2W  | 77.78 (1)  |
| O4-Dy1-O3W  | 84.84(1)   | O5-Dy1-O6   | 51.21(1)   |
| O5-Dy1-O1W  | 71.39(1)   | O5-Dy1-O2W  | 74.12(1)   |
| O5-Dy1-O3W  | 139.71(1)  | O6-Dy1-O1W  | 74.96(1)   |
| O6-Dy1-O2W  | 72.98(1)   | O6-Dy1-O3W  | 132.81(1)  |
| O1W-Dy1-O2W | 142.91(1)  | O1W-Dy1-O3W | 145.38(1)  |
| O2W-Dy1-O3W | 71.70(1)   | O2-Cu-O3    | 83.40(1)   |
| O2-Cu-N7    | 88.50(1)   | O2-Cu-N10   | 94.00(1)   |
| O2-Cu-N11   | 178.28(2)  | O3-Cu-N7    | 96.05(1)   |
| O3-Cu-N10   | 170.82(2)  | O3-Cu-N11   | 95.91(2)   |
| N7-Cu-N10   | 92.67(2)   | N7-Cu-N11   | 93.14(1)   |
| N10-Cu-N11  | 86.44(2)   | N1-Fe1-N3   | 89.11(2)   |
| N1-Fe1-N5   | 88.62(2)   | N3-Fe1-N5   | 90.57(2)   |
| C16-Fe1-C17 | 85.42(2)   | C16-Fe1-C18 | 85.64(2)   |
| C17-Fe1-C18 | 90.64(3)   | N7-C16-Fe1  | 176.61(5)  |
| N8-C17-Fe1  | 179.37 (5) | N9-C18-Fe1  | 178.96 (6) |
| C56-Fe2-C57 | 84.62(2)   | N19-C56-Fe2 | 175.95(5)  |
| N20-C57-Fe2 | 175.24(5)  | N21-C58-Fe2 | 178.31(5)  |

**Table S8.** Results of the Continuous Shape Measure Analysisa geometry<sup>a</sup>

| Geometry    | CSAPR-9     | JCSAPR-9 | CCU-9 |
|-------------|-------------|----------|-------|
| <b>1-RR</b> | <b>3.77</b> | 4.54     | 6.79  |
| <b>1-SS</b> | <b>3.94</b> | 4.74     | 6.68  |
| <b>2-RR</b> | <b>3.83</b> | 4.61     | 6.88  |
| <b>2-SS</b> | <b>3.80</b> | 4.58     | 6.84  |
| <b>3-RR</b> | <b>4.06</b> | 4.82     | 6.56  |
| <b>3-SS</b> | <b>3.74</b> | 4.51     | 6.78  |

<sup>a</sup>CSAPR-9 is the shape measure relative to the spherical capped square antiprism; JCSAPR-9 is the shape measure relative to the capped square antiprism; CCU-9 is the shape measure relative to the spherical-relaxed capped cube. The number in bold corresponds to the closer ideal geometry to the real complexes.



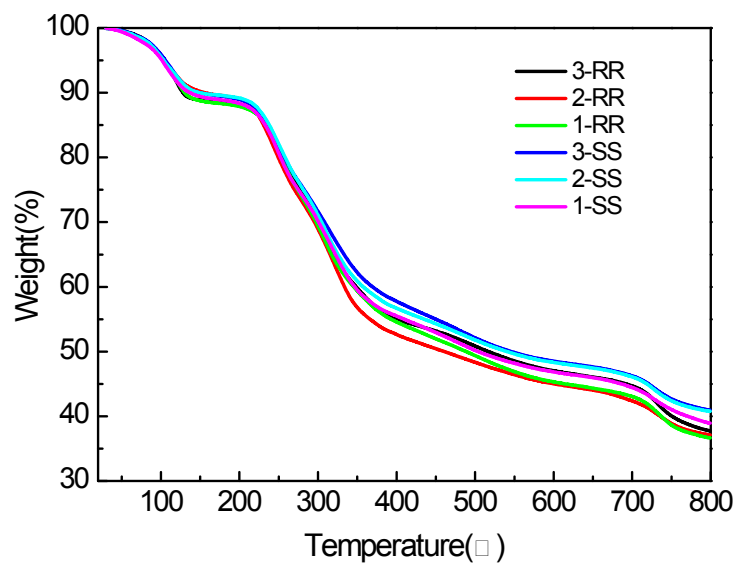

**Figure S1.** The thermogravimetry curves of all complexes in an N<sub>2</sub> atmosphere at a heating rate of 10 °C/min.

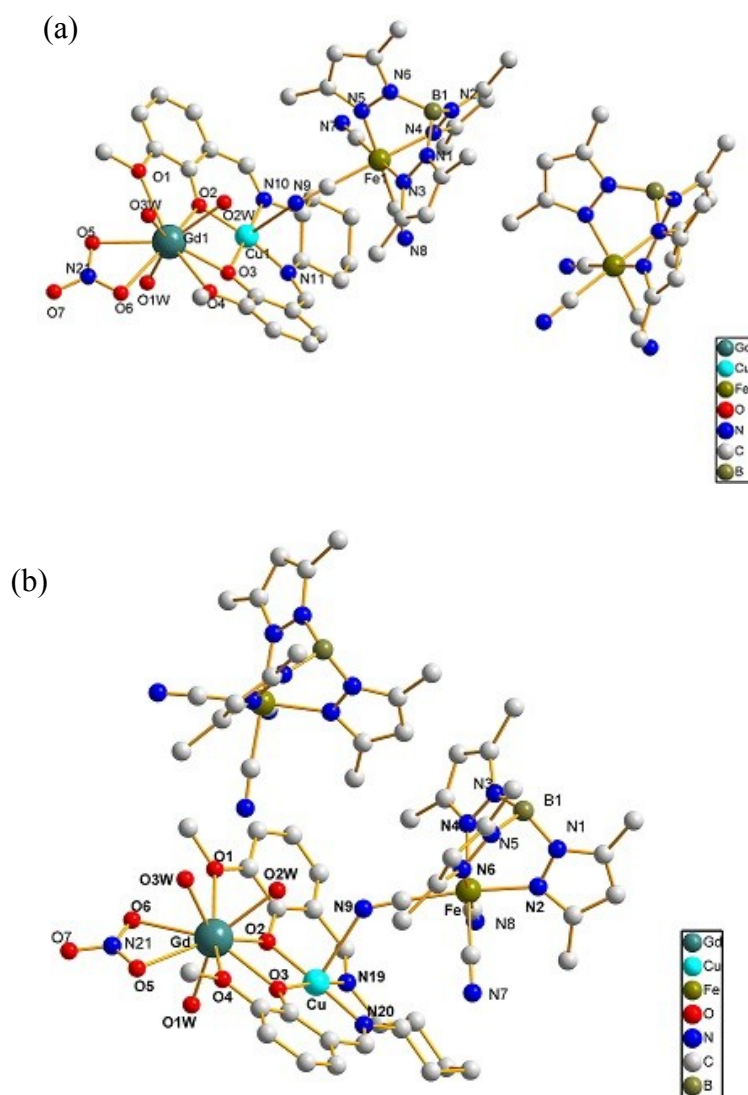

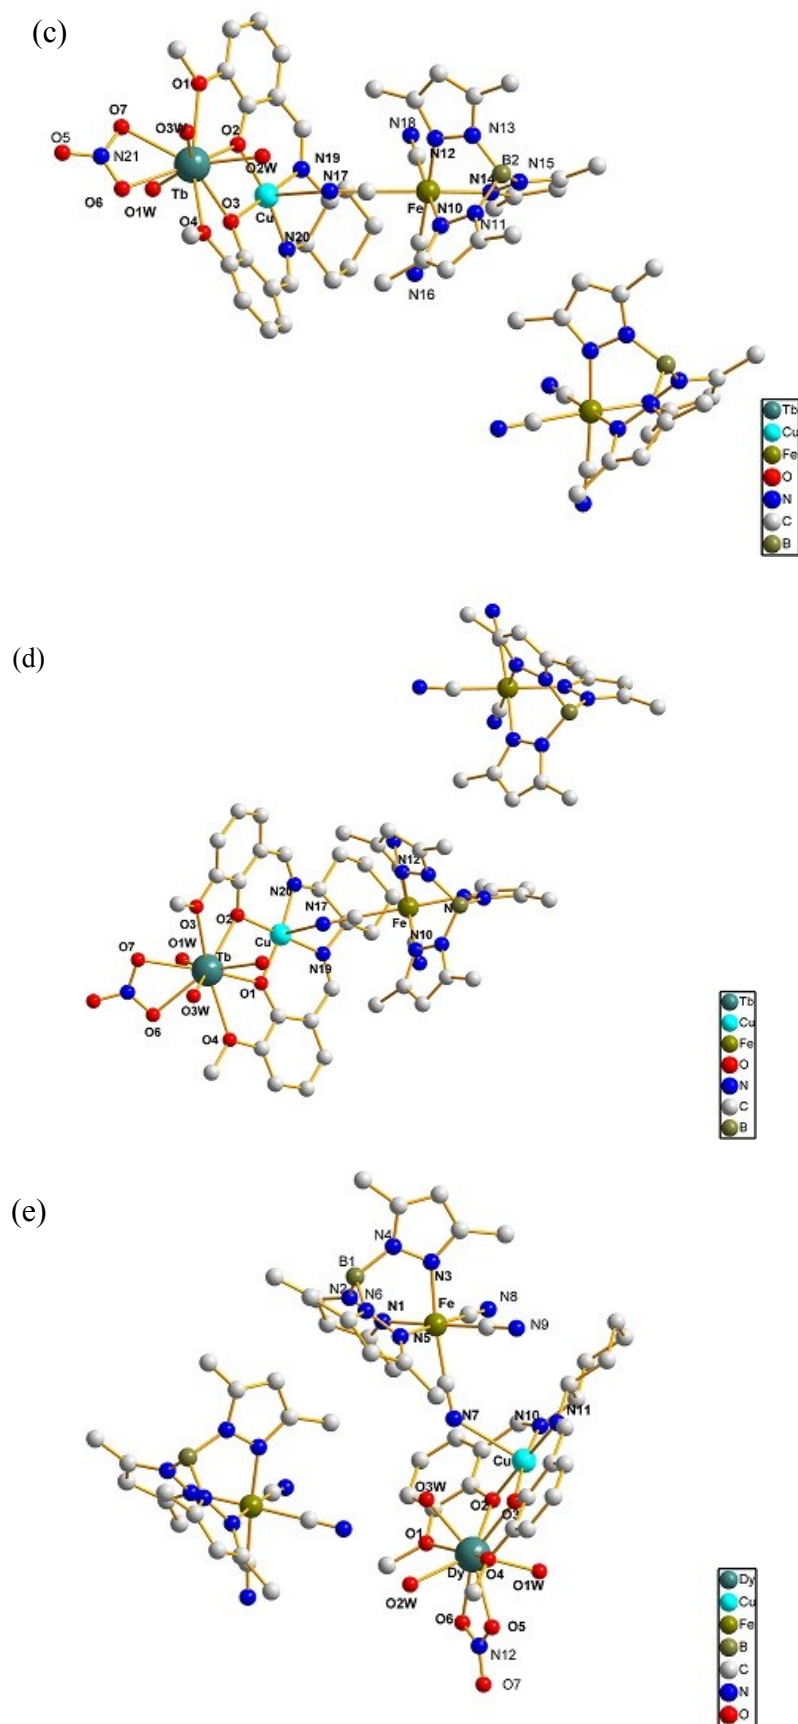

**Figure S2.** Perspective drawing of the crystallographic structural unit of **1-RR** (a), **1-SS** (b), **2-RR** (c), **2-SS** (d), and **3-SS** (e), respectively, showing the atom numbering. H atoms are omitted for

clarity.

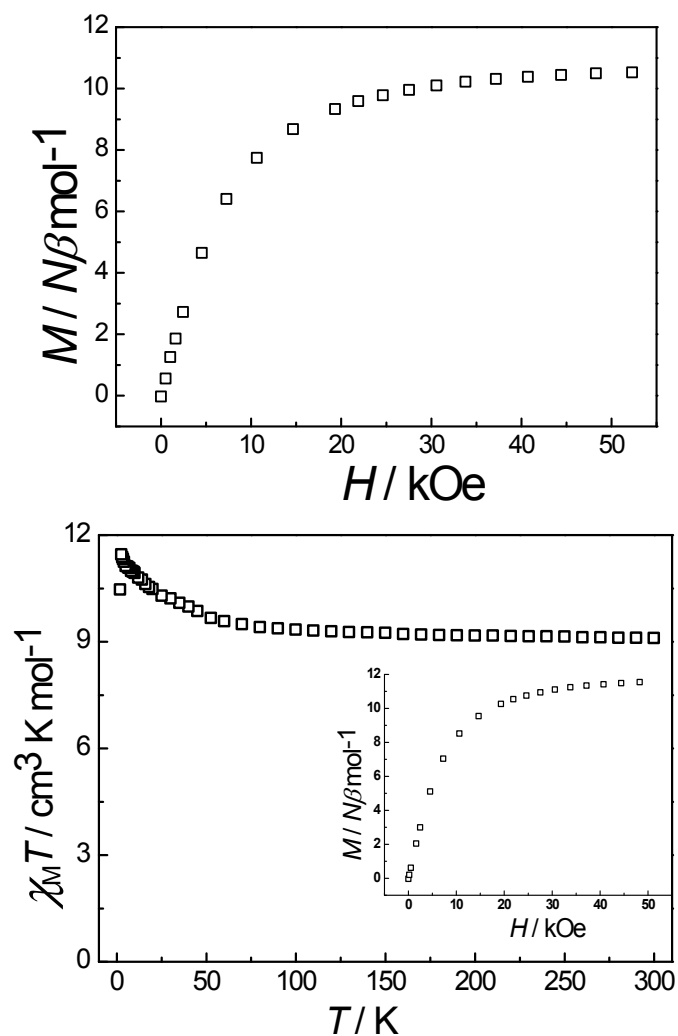

**Figure S3.** Up: Field dependence of magnetization for **1-RR** at 1.8 K. Down: Temperature dependence of the  $\chi_M T$  product for **1-SS** under an applied magnetic fields of 100 kOe. Inset: Field dependence of magnetization for **1-SS** at low temperature..

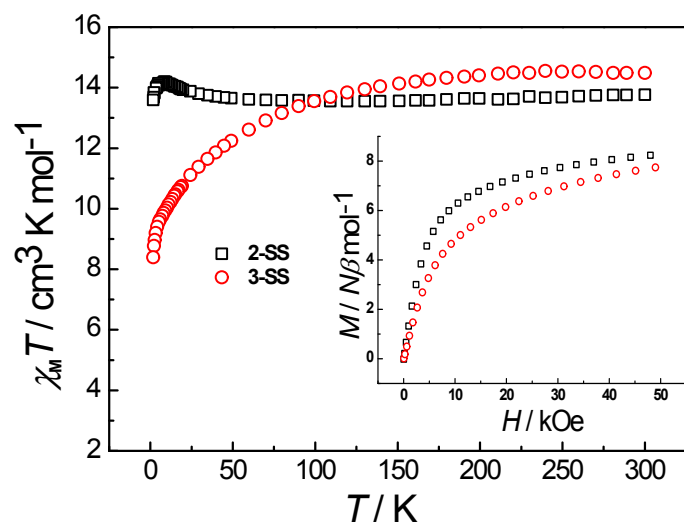

**Figure S4.** Temperature dependence of the  $\chi_M T$  product for **2-SS**, **3-SS** at 1 kOe. Inset: Field dependence of magnetization for **2-SS**, **3-SS** at 1.8 K.

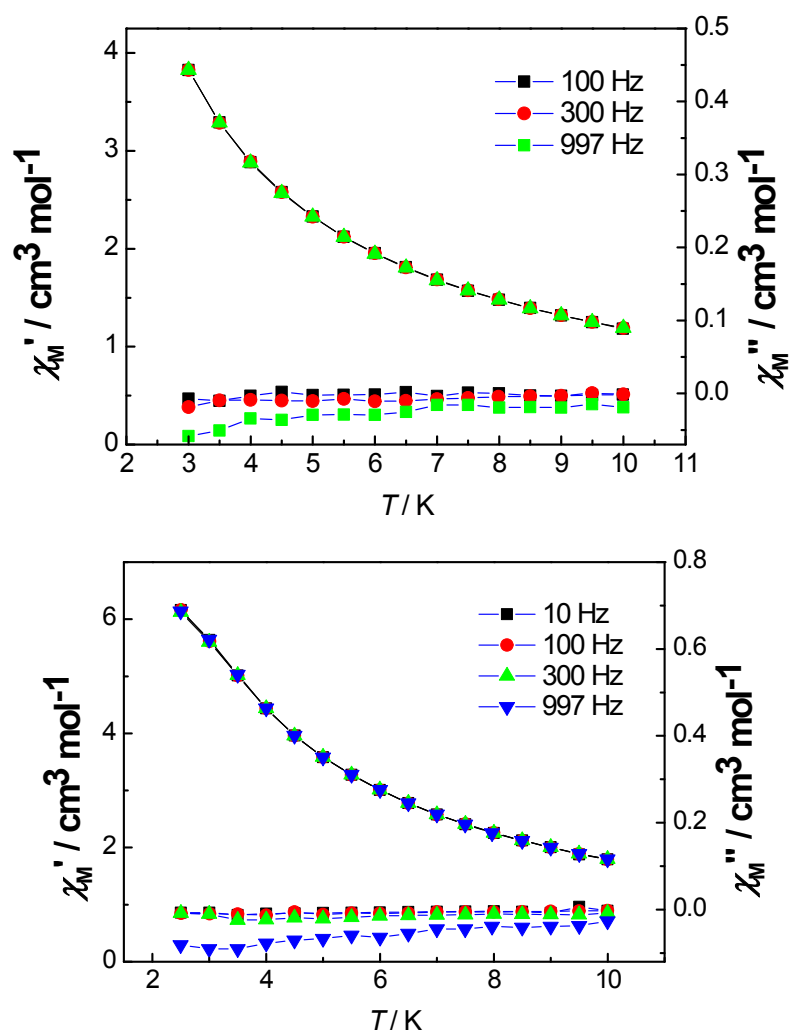

**Figure S5.** Temperature dependence of the in-phase  $\chi''$  and out-of-phase  $\chi'$  at different frequencies in a 2.5 Oe ac field oscillating at 100–997 Hz with a dc field of 0 Oe for **2-RR** (up) and **3-RR** (down).
